# Supplementary material
Source: publisher figshare collection journal article supplement (https://tandf.figshare.com/ndownloader/files/29077262)
Supplement: Supplementary file 1 [file 29077262]

**SUPPLEMENTARY C**

**Data (Figure 1)**

| **Number of patients** | **Site** | **Type** | **Prop** | **LowerCI** | **UpperCI** |
| --- | --- | --- | --- | --- | --- |
| 344 | Lung & pleura | DM | 0.69 | 0.65 | 0.73 |
| 125 | Lung & pleura | M1 | 0.63 | 0.56 | 0.70 |
| 141 | Bone | DM | 0.28 | 0.24 | 0.33 |
| 45 | Bone | M1 | 0.23 | 0.17 | 0.29 |
| 108 | Lymph nodes | DM | 0.22 | 0.18 | 0.26 |
| 45 | Lymph nodes | M1 | 0.23 | 0.17 | 0.29 |
| 88 | Liver | DM | 0.18 | 0.14 | 0.21 |
| 44 | Liver | M1 | 0.22 | 0.17 | 0.29 |
| 66 | Other | DM | 0.13 | 0.10 | 0.17 |
| 16 | Other | M1 | 0.08 | 0.05 | 0.13 |

**Data (Figure 3)**

| **Number of patients** | **Total number of patients** | **Site** | **Subsite** | **Prop** | **LowerCI** | **UpperCI** |
| --- | --- | --- | --- | --- | --- | --- |
| 33 | 40 | Lung & pleura | Glottic Larynx | 0.83 | 0.67 | 0.93 |
| 95 | 132 | Lung & pleura | p16- positive OPSCC | 0.72 | 0.63 | 0.79 |
| 73 | 100 | Lung & pleura | p16- negative OPSCC | 0.73 | 0.63 | 0.81 |
| 80 | 122 | Lung & pleura | Hypopharynx | 0.66 | 0.56 | 0.74 |
| 20 | 32 | Lung & pleura | Nasopharynx | 0.63 | 0.44 | 0.79 |
| 35 | 56 | Lung & pleura | Non-glottic Larynx | 0.63 | 0.49 | 0.75 |
| 10 | 40 | Bone | Glottic Larynx | 0.25 | 0.13 | 0.41 |
| 35 | 132 | Bone | p16- positive OPSCC | 0.27 | 0.19 | 0.35 |
| 27 | 100 | Bone | p16- negative OPSCC | 0.27 | 0.19 | 0.37 |
| 41 | 122 | Bone | Hypopharynx | 0.34 | 0.25 | 0.43 |
| 9 | 32 | Bone | Nasopharynx | 0.28 | 0.14 | 0.47 |
| 13 | 56 | Bone | Non-glottic Larynx | 0.23 | 0.13 | 0.36 |
| 8 | 40 | Lymph nodes | Glottic Larynx | 0.20 | 0.09 | 0.36 |
| 29 | 132 | Lymph nodes | p16- positive OPSCC | 0.22 | 0.15 | 0.30 |
| 16 | 100 | Lymph nodes | p16- negative OPSCC | 0.16 | 0.09 | 0.25 |
| 28 | 122 | Lymph nodes | Hypopharynx | 0.23 | 0.16 | 0.31 |
| 10 | 32 | Lymph nodes | Nasopharynx | 0.31 | 0.16 | 0.50 |
| 13 | 56 | Lymph nodes | Non-glottic Larynx | 0.23 | 0.13 | 0.36 |
| 5 | 40 | Liver | Glottic Larynx | 0.13 | 0.04 | 0.27 |
| 24 | 132 | Liver | p16- positive OPSCC | 0.18 | 0.12 | 0.26 |
| 15 | 100 | Liver | p16- negative OPSCC | 0.15 | 0.09 | 0.24 |
| 26 | 122 | Liver | Hypopharynx | 0.21 | 0.14 | 0.30 |
| 6 | 32 | Liver | Nasopharynx | 0.19 | 0.07 | 0.36 |
| 9 | 56 | Liver | Non-glottic Larynx | 0.16 | 0.08 | 0.28 |
| 2 | 40 | Other | Glottic Larynx | 0.05 | 0.01 | 0.17 |
| 21 | 132 | Other | p16- positive OPSCC | 0.16 | 0.10 | 0.23 |
| 15 | 100 | Other | p16- negative OPSCC | 0.15 | 0.09 | 0.24 |
| 20 | 122 | Other | Hypopharynx | 0.16 | 0.10 | 0.24 |
| 2 | 32 | Other | Nasopharynx | 0.06 | 0.01 | 0.21 |
| 5 | 56 | Other | Non-glottic Larynx | 0.09 | 0.03 | 0.20 |

*Confidence intervals are constructed from the binominal distribution

**Supplementary C:**  Tables displaying data for Figure 1 and Figure 3.
